# Supplementary material for: Rapid evolution of chemosensory receptor genes in a pair of sibling species of orchid bees (Apidae: Euglossini)
Source: PubMed Central journal article supplement (PMC4552289; doi:10.1186/s12862-015-0451-9), 2015-08-28
Supplement: 12862_2015_451_MOESM2_ESM.pdf [file 12862_2015_451_MOESM2_ESM.pdf]

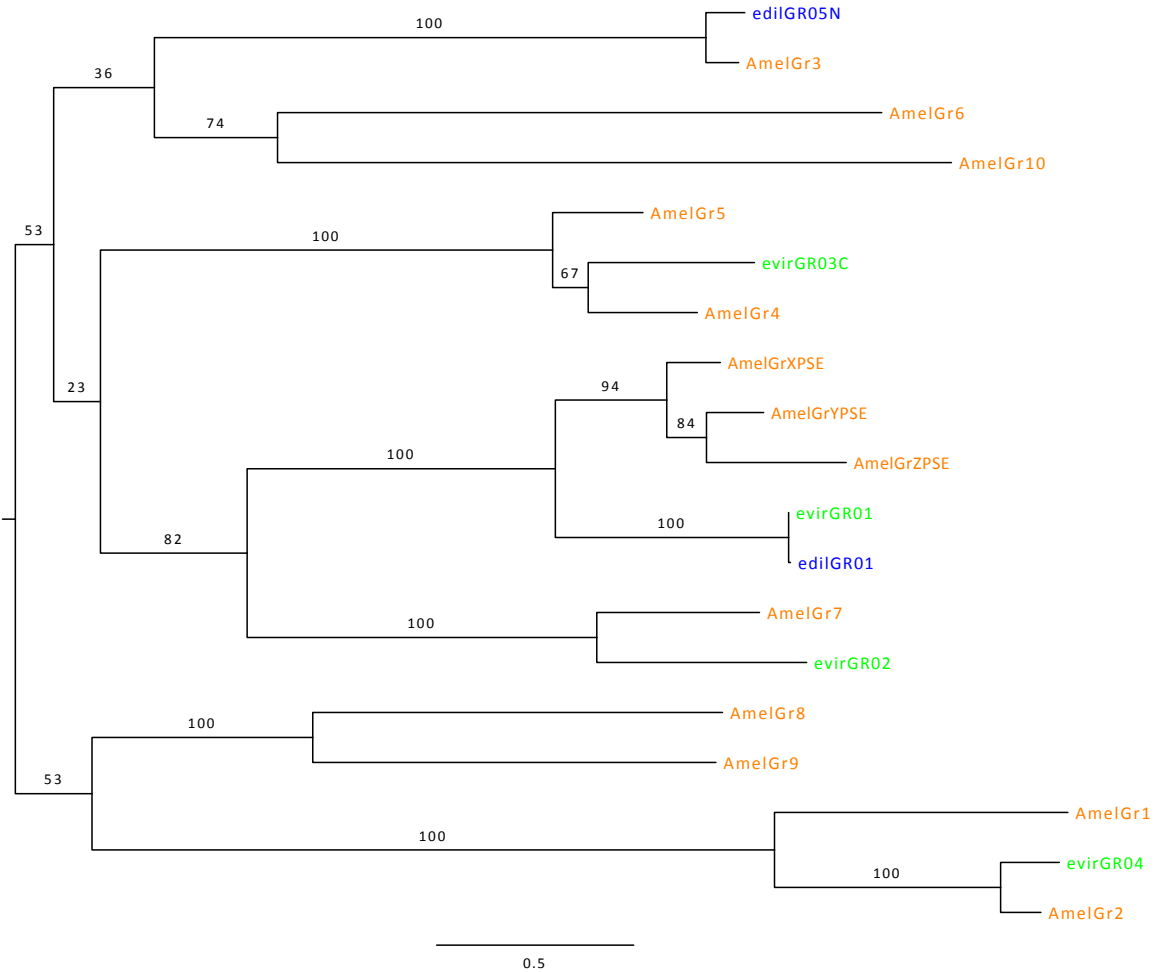

8  
9  
10  
11  
12  
13  
14

**Figure S2. Phylogenetic relationships of the 2 candidate *E. dilemma* (blue) and 4 *E. viridissima* (green) Gustatory Receptors to *A. mellifera* (orange).** This maximum likelihood tree was rooted at the midpoint in absence of a suitable outgroup. Numbers above branches show bootstrap-supports based on 1000 replicates. Symbols after the GR descriptors: C: C-terminus is missing, N: N-terminus is missing, PSE: pseudogene (after Robertson and Wanner 2006).

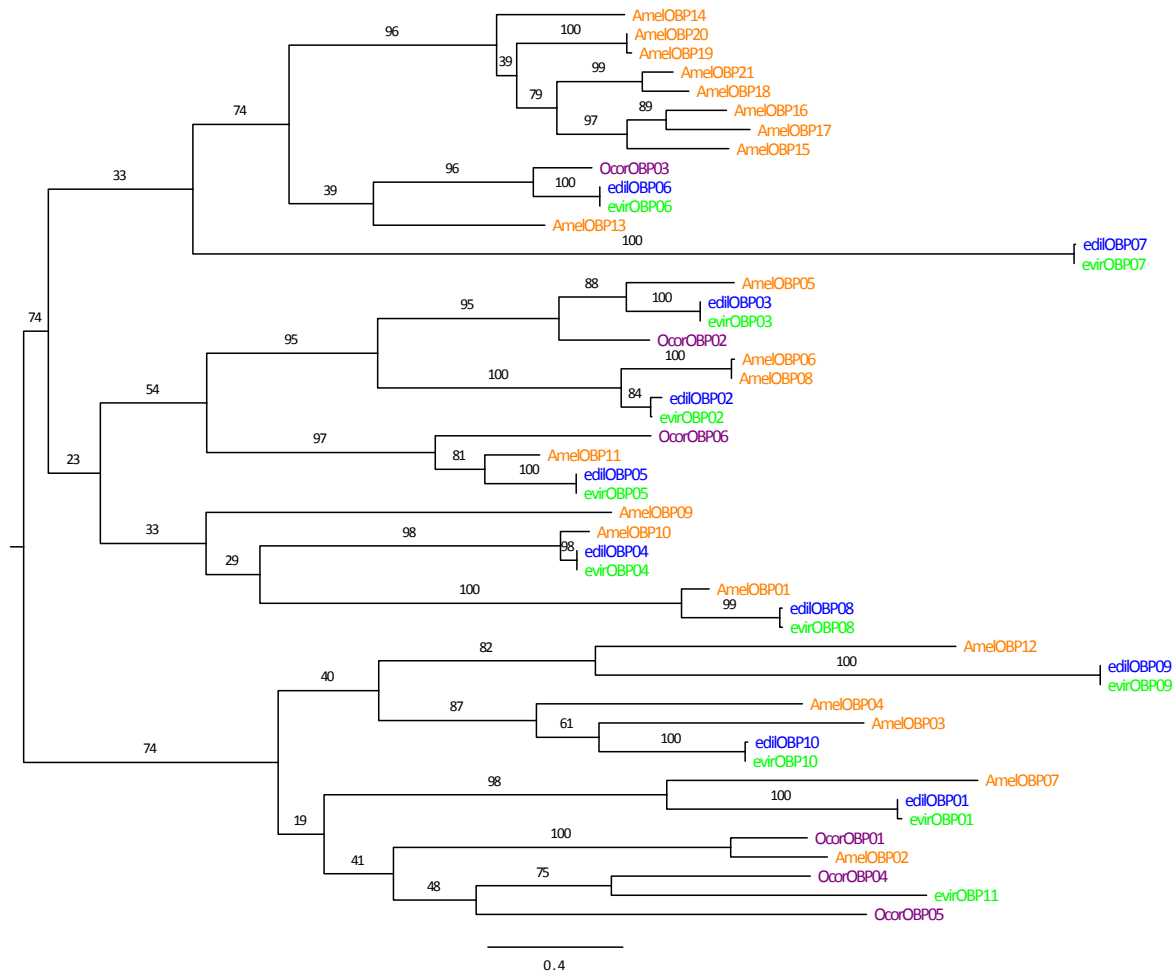

15  
16  
17  
18  
19

**Figure S3. Phylogenetic relationships of the 10 candidate *E. dilemma* (blue) and 11 *E. viridissima* (green) Odorant Binding Proteins to *A. mellifera* (orange) and *Osmia cornuta* (purple).** This maximum likelihood tree was rooted at midpoint in absence of a suitable outgroup. Numbers above branches show bootstrap-supports based on 1000 replicates.

20

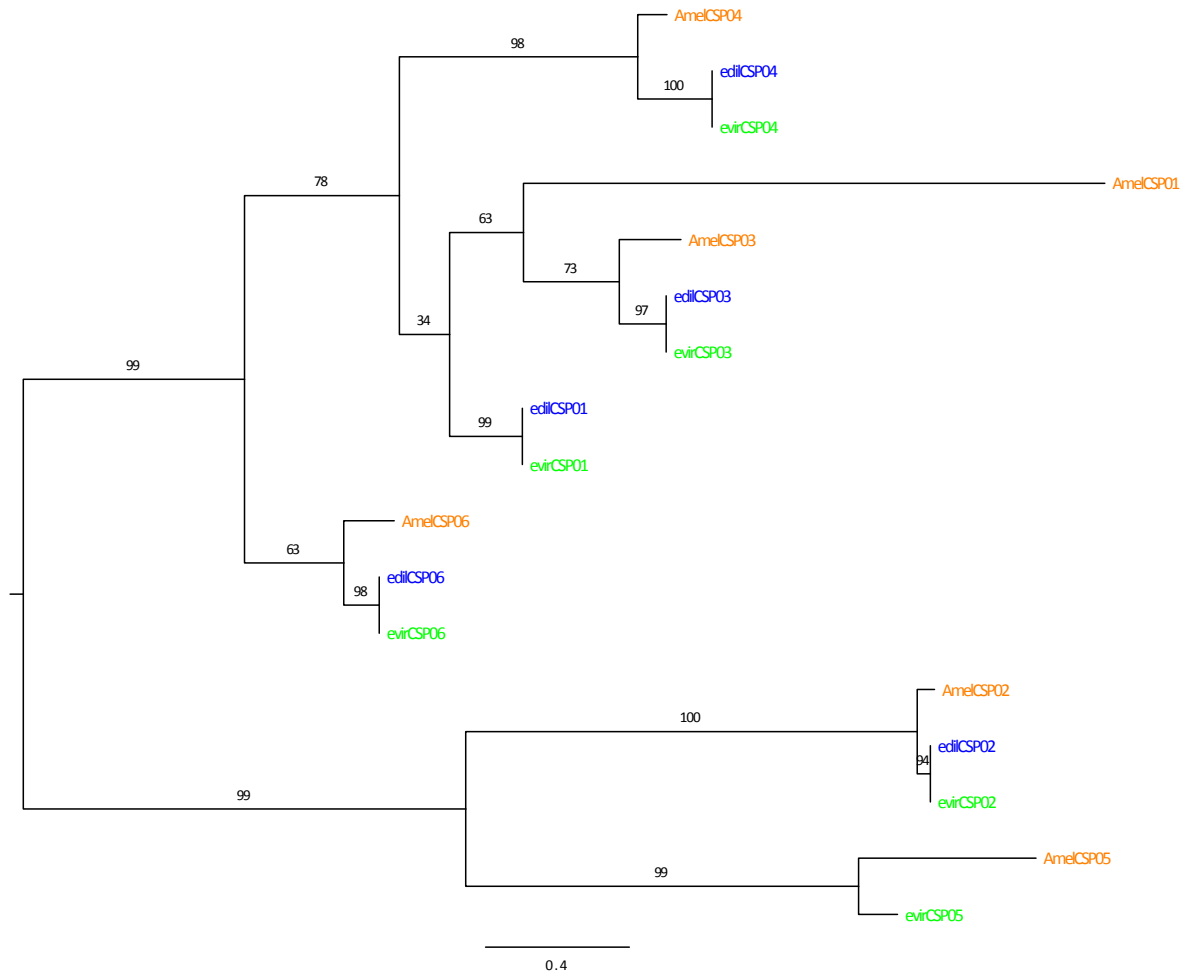

21  
 22 **Figure S4 Phylogenetic relationships of the 5 candidate *E. dilemma* (blue) and 6 *E. viridissima* (green)**  
 23 **Chemosensory Proteins to *A. mellifera* (orange)** The maximum likelihood tree was rooted at midpoint in absence  
 24 of a suitable outgroup. Numbers above branches show bootstrap-supports based on 1000 replicates.

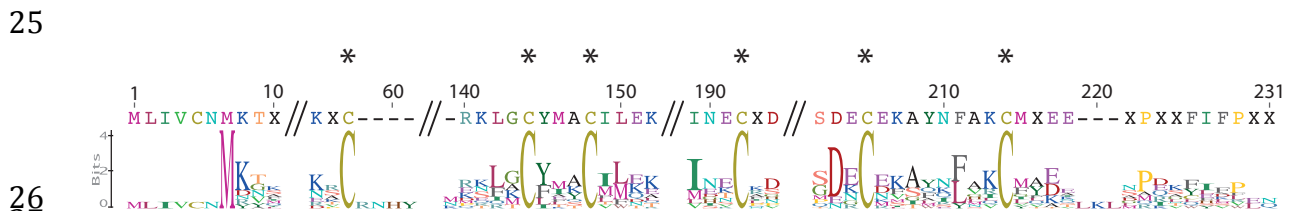

26  
 27  
 28 **Figure S5 Sequence logo of the protein sequence alignment of all candidate *Euglossa* OBPs** Relative sizes of  
 29 letters indicate the frequency of an amino acid at the given site among the entire alignment. \* indicates conserved  
 30 cysteines present in all OBP sequences. Letters above the sequence logo represent the consensus sequence of the  
 31 alignment at indicated positions.



33 **Figure S6 Distribution of transmembrane (TM) domains across Odorant Receptor (OR) sequences.** All ORs  
34 showing  $d_N/d_S > 1$  represented by the *Euglossa dilemma* homologs (indicated by edilORXX) were aligned using MAFFT  
35 (see Materials and Methods) and consensus TM predictions were mapped onto the respective OR sequences (Red  
36 boxes; Supplementary Table S5). Amino acids are colored by the degree of conservation relative to amino acids at  
37 homologous sites in the alignment using a color gradient from white for unconserved to black for highly conserved  
38 residues. Mean hydrophobicity is indicated for each site in a barplot above the alignment. The Plot was generated in  
39 Geneious v5.4.6.

40
